# Supplementary material
Source: PubMed Central journal article supplement (PMC6566861)
Supplement: NIHMS917698-supplement-1.pdf [file NIHMS917698-supplement-1.pdf]

## Supplementary Figures and Legends

| References for FIGURE 2<br>ACUTE ETHANOL |                                                                                                               |          |                                                                                                                                                      |          |                                                                            |
|------------------------------------------|---------------------------------------------------------------------------------------------------------------|----------|------------------------------------------------------------------------------------------------------------------------------------------------------|----------|----------------------------------------------------------------------------|
| <b>a</b>                                 | Adermark et al., 2014; Theile et al., 2011; Xiao and Ye, 2008; Xiao et al., 2007; Nimitvilai et al., 2016b    | <b>j</b> | Herman and Roberto, 2014                                                                                                                             | <b>t</b> | Hendricson et al., 2002; Izume and Zorumski, 2012; Overstreet et al., 1997 |
| <b>b</b>                                 | Theile et al., 2009; Theile et al., 2011                                                                      | <b>k</b> | Diaz and Valenzuela, 2016                                                                                                                            | <b>u</b> | Yin et al., 2007; Clarke and Adermark, 2010; McCool, 2011                  |
| <b>c</b>                                 | Deehan et al., 2016                                                                                           | <b>l</b> | Kaplan et al., 2013                                                                                                                                  | <b>v</b> | Wilcox et al., 2014; Patton et al., 2016                                   |
| <b>d</b>                                 | Mrejeru et al., 2015; Avegno et al., 2016                                                                     | <b>m</b> | Carta et al., 2004                                                                                                                                   |          |                                                                            |
| <b>e</b>                                 | Yoshimoto et al., 1992; Ericson et al., 1998; Boileau et al., 2003; Aalto et al., 2015; Bassareo et al., 2017 | <b>n</b> | Zhu and Lovinger, 2006                                                                                                                               |          |                                                                            |
| <b>f</b>                                 | Benjamin et al., 1993; Zapata and Shippenberg, 2006                                                           | <b>o</b> | Talani and Lovinger 2015; Roberto et al., 2010                                                                                                       |          |                                                                            |
| <b>g</b>                                 | Stobbs et al., 2004; Adermark et al., 2014; Burkhardt and Adermark, 2014                                      | <b>p</b> | Nie et al., 2004; Bajo et al., 2008                                                                                                                  |          |                                                                            |
| <b>h</b>                                 | Blomeley et al., 2011; Adermark et al., 2011                                                                  | <b>q</b> | Lovinger et al., 1990                                                                                                                                |          |                                                                            |
| <b>i</b>                                 | Blomeley et al., 2011; Burkhardt and Adermark, 2014                                                           | <b>r</b> | Roberto et al., 2006; Roberto et al., 2004; Zhu et al., 2007; Kirson et al., 2017                                                                    |          |                                                                            |
|                                          |                                                                                                               | <b>s</b> | Blitzer et al., 1990; Weiner et al., 1997; Chandler et al., 1998; Izumi et al., 2005; Bray et al., 2013; Tokuda et al., 2014; Hernandez et al., 2016 |          |                                                                            |

Supplementary Figure 1: references for highlighted effects marked in Figure 2.

| References for FIGURE 3<br>CHRONIC ETHANOL |                                                                                                                                 |          |                                                                                                                               |
|--------------------------------------------|---------------------------------------------------------------------------------------------------------------------------------|----------|-------------------------------------------------------------------------------------------------------------------------------|
| <b>a</b>                                   | Mulholland et al., 2011                                                                                                         | <b>j</b> | Durant and Carlen, 1984; Roberto et al., 2002; Thinschmidt et al., 2003; Silvestre de Ferron et al., 2015; Coune et al., 2017 |
| <b>b</b>                                   | Hopf et al., 2010; Padula et al., 2015                                                                                          | <b>k</b> | Kroener et al., 2012                                                                                                          |
| <b>c</b>                                   | Okamoto et al., 2006; Perra et al., 2011                                                                                        | <b>l</b> | Nimitvilai et al., 2016a                                                                                                      |
| <b>d</b>                                   | Volkow et al., 2002; Siciliano et al., 2015; Hirth et al., 2016; Karkhanis et al., 2016; Volkow et al., 2017; Rose et al., 2017 | <b>m</b> | Wang et al., 2012; Ma et al., 2017                                                                                            |
| <b>e</b>                                   | Wanat et al., 2009; Schindler et al., 2016                                                                                      | <b>n</b> | Adermark et al., 2011c; Cui et al., 2011; DePoy et al., 2013                                                                  |
| <b>f</b>                                   | Review in Roberto and Varodayan, 2017                                                                                           | <b>o</b> | Jeanes et al., 2014; Renteria et al., 2017                                                                                    |
| <b>g</b>                                   | Lack et al., 2007; Christian et al., 2013; Roberto and Varodayan, 2017                                                          | <b>p</b> | Abraham et al., 2013                                                                                                          |
| <b>h</b>                                   | Roberto et al., 2004a; Roberto and Varodayan, 2017                                                                              | <b>q</b> | Bernier et al., 2011                                                                                                          |
| <b>i</b>                                   | Radke et al., 2017a; Radke et al., 2017b                                                                                        | <b>r</b> | Guan and Ye, 2010                                                                                                             |
|                                            |                                                                                                                                 | <b>s</b> | Cuzon Carlson et al., 2011; Wilcox et al., 2014                                                                               |

Supplementary Figure 2: references for highlighted effects marked in Figure 3.
